# Supplementary material for: Silencing markers are retained on pericentric heterochromatin during murine primordial germ cell development
Source: PubMed Central journal article supplement (PMC5346203; doi:10.1186/s13072-017-0119-3), 2017-03-11

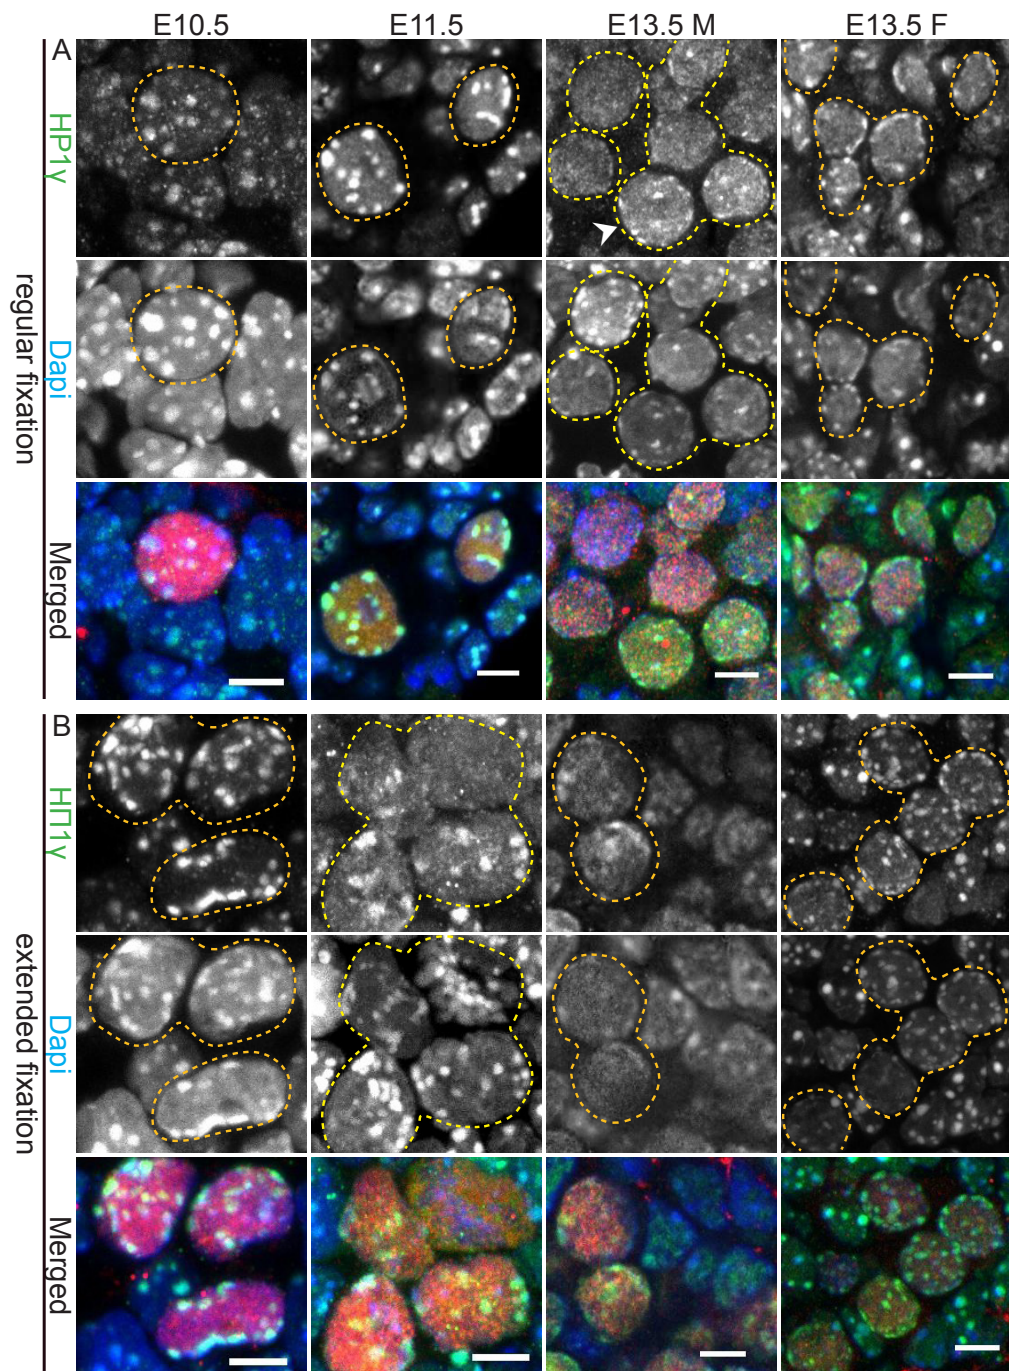

Supplement: 13072_2017_119_MOESM3_ESM.pdf [file 13072_2017_119_MOESM3_ESM.pdf]
