# Supplementary material for: Silencing markers are retained on pericentric heterochromatin during murine primordial germ cell development
Source: PubMed Central journal article supplement (PMC5346203; doi:10.1186/s13072-017-0119-3), 2017-03-11
Supplement: 13072_2017_119_MOESM4_ESM.pdf [file 13072_2017_119_MOESM4_ESM.pdf]

**Table 1: Summary of the immunosignals at pericentric heterochromatin of PGCs**

|                 | 4% PFA<br>(regular)<br>paraffin        | 4% PFA<br>(extended)<br>paraffin       | 4% PFA<br>(regular)<br>cryo            | 4% PFA<br>(extended)<br>cryo           | 1% PFA<br>nuclear<br>spreads           |
|-----------------|----------------------------------------|----------------------------------------|----------------------------------------|----------------------------------------|----------------------------------------|
| <b>H3K9me3</b>  | No signal                              | No signal                              | +E10.5<br>-E11.5<br>+E13.5♂<br>+E13.5♀ | +E10.5<br>+E11.5<br>+E13.5♂<br>+E13.5♀ | +E10.5<br><E11.5<br>+E13.5♂<br><E13.5♀ |
| <b>HP1α</b>     | +E10.5<br>-E11.5<br>-E13.5♂<br>-E13.5♀ | +E10.5<br>*E11.5<br>-E13.5♂<br>+E13.5♀ | n.d.                                   | n.d.                                   | <E10.5<br>+E11.5<br><E13.5♂<br><E13.5♀ |
| <b>HP1β</b>     | +E10.5<br>+E11.5<br>-E13.5♂<br>-E13.5♀ | +E10.5<br>+E11.5<br>+E13.5♂<br>+E13.5♀ | n.d.                                   | n.d.                                   | <E10.5<br><E11.5<br><E13.5♂<br><E13.5♀ |
| <b>HP1γ</b>     | +E10.5<br>+E11.5<br>*E13.5♂<br>+E13.5♀ | +E10.5<br>+E11.5<br>+E13.5♂<br>+E13.5♀ | n.d.                                   | n.d.                                   | >E10.5<br>>E11.5<br>+E13.5♂<br>+E13.5♀ |
| <b>H4K20me3</b> | +E10.5<br>-E11.5<br>*E13.5♂<br>*E13.5♀ | +E10.5<br>+E11.5<br>+E13.5♂<br>+E13.5♀ | n.d.                                   | n.d.                                   | <E10.5<br><E11.5<br><E13.5♂<br><E13.5♀ |
| <b>ATRX</b>     | n.d.                                   | n.d.                                   | n.d.                                   | n.d.                                   | +E10.5<br>>E11.5<br>+E13.5♂<br>+E13.5♀ |
